# Supplementary material for: Anti-HCV antibodies: A battle for breadth and potency
Source: Research Square preprint supplement (doi:10.21203/rs.3.rs-5876231/v1), 2025-01-28
Supplement: Supplementary file 1 [file 588b7a1c9517b5eea0d3773d.docx]

**SUPPLEMENTARY TABLES AND FIGURES**

**Supplementary Table 1:** Neutralisation profiles of HIV bNAbs

| **Epitope** | **bNAb** | **% Coveragescaled**  **(IC50<50µg/m)L)** | **IC50 geom mean Potency (µg/mL)** | **Number of variants tested** | **Ref.** |
| --- | --- | --- | --- | --- | --- |
| CD4 bs | b12 | 37.8 | 4.32 | 118 | (1-3) |
| HJ16 | 32.6 | 1.17 | 118 | (4, 5) |
| VRC01 | 78.2 | 0.38 | 118 | (6) |
| VRC03 | 45.5 | 0.8 | 118 | (6) |
| 1B2530 | 61.8 | 3.62 | 118 | (7) |
| PGV04 | 69.6 | 0.32 | 118 | (8) |
| NIH45-46 | 73.9 | 0.11 | 118 | (7) |
| 12A12 | 79.9 | 0.22 | 118 | (7) |
| 3BNC117 | 76.5 | 0.12 | 118 | (7) |
| VRC-CH31 | 72.2 | 0.32 | 118 | (8) |
| CH103 | 57.6 | 2.28 | 118 | (9) |
| VRC13 | 73.9 | 0.27 | 118 | (10) |
| 179NC75 | 26.6 | 0.16 | 118 | (11) |
| IOMA | 42.1 | 2.33 | 118 | (4) |
| N49P7 | 85.9 | 0.44 | 118 | (12) |
| 1-18 | 83.3 | 0.05 | 118 | (13) |
| V3 high mannose patch | PGT121 | 56.7 | 0.07 | 118 | (14) |
| PGT128 | 58.4 | 0.06 | 118 | (14) |
| PGT130 | 52.4 | 0.2 | 118 | (14) |
| PGT135 | 28.3 | 0.61 | 118 | (14) |
| 10-1074 | 54.1 | 0.06 | 118 | (15) |
| PCDN-33A | 39.5 | 0.5 | 118 | (16) |
| BG18 | 52.4 | 0.03 | 118 | (16) |
| M4008_N1 | 30.9 | 0.95 | 118 | (17) |
| Trimer Apex | PG9 | 74.7 | 0.15 | 118 | (18) |
| PG16 | 71.3 | 0.08 | 118 | (18) |
| PGT145 | 67.0 | 0.13 | 118 | (14) |
| CH01 | 46.4 | 1.38 | 118 | (19) |
| PGDM1400 | 71.3 | 0.02 | 118 | (20) |
| VRC26.08 | 49.0 | 0.02 | 118 | (21) |
| BG1 | 30.1 | 0.61 | 118 | (22) |
| MPER | 10E8 | 84.2 | 0.36 | 118 | (23) |
| 2F5 | 49.8 | 2.83 | 118 | (24) |
| 4E10 | 84.2 | 1.81 | 118 | (3) |
| LN01 | 79.0 | 0.96 | 118 | (25) |
| gp120 -gp41 interface | 8ANC195 | 58.4 | 1.23 | 118 | (7, 26) |
| PGT151 | 62.7 | 0.04 | 118 | (27, 28) |
| 35O22 | 43.8 | 0.26 | 118 | (29) |
| Silent face | VRC-PG05 | 26.6 | 2.33 | 118 | (30) |
| SF12 | 54.1 | 0.21 | 118 | (31) |

**Supplementary Table 2:** Neutralisation profiles of HCV bNAbs

| **Epitope** | **bNAb** | **% Coveragescaled**  **(IC50<50µg/)mL)** | **IC50 Range(µg/mL)** | **IC50 geom mean Potency (µg/mL)** | **IC50 against H77(µg/mL)** | **Ref.** |
| --- | --- | --- | --- | --- | --- | --- |
| AR4 | AR4A | 91.53 | 0.03->100 | 2.5 | 1.94 | (32-34) |
| AR5 | AR5A | 74.87 | 0.1->100 | 5.1 | 1.28 | (32, 33) |
| Domain B | HEPC3 | 86.07 | 0.0007->100 | 1.15 | 0.7 | (35, 36) |
| HC-11 | 86.66 | 0.03->100 | 1.5 | 1.6 | (33) |
| HC-1AM | 100.00 | 0.13-98 | 1.83 | 4.7 | (33) |
| AR3A | 82.02 | <0.005->100 | 2.7 | 2.34 | (32-34) |
| AR3B | 94.09 | 1-10 | 2.03 | 1 | (37) |
| AR3C | 94.09 | 1-10 | 2.16 | 1 | (38) |
| HC74 | 88.90 | 0.02->50 | 0.22 | 1 | (35) |
| CBH5 | 76.70 | 0.017->100 | 1.9 | 55.31 | (33) |
| Domain D | HC84.24 | 94.41 | 0.0078-36 | 1.7 | 0.43 | (33) |
| HC84.26 | 75.76 | 0.02->100 | 1.9 | 0.52 | (33, 34) |
| HC84.27 | 97.76 | 0.00044-57.0 | 7.9 | 1.2 | (39) |
| HC84 | 53.36 | 0.1->50 | 2.34 |  | (35) |
| Domain E | HCV1 | 88.21 | 0.19-100 | 2.6 | 0.85 | (34) |
| h AP33 | 91.98 | 0.01->100 | 2.6 | 1.09 | (34, 40) |
| Domain C | CBH7 | 33.92 | 0.6->100 | 5.8 | 22.9 | (34) |
| AR2A | 51.28 | 1-10 | 3.68 | 1 | (37) |
| E1 | IGH505 | 80.04 | 1-100 | 6.74 | 6 | (41) |
| AR2 | IGH526 | 80.04 | 1-100 | 7.4 | 2 | (41) |
|  | HEPC43 | 88.90 | 0.00002->50 | 1.1 | 5 | (35) |
|  | HC33.4 | 63.46 | 0.1->100 | 5.4 | 1.58 | (34, 42) |
|  | HC33.4.10 | 76.66 | 0.45->100 | 4.23 | 0.45 | (33) |
|  | HC33.1 | 60.94 | 0.4->50 | 2.6 | 17.5 | (39) |

**Supplementary Table 3:** Neutralisation profiles of influenza bNAbs

| **Epitope** | **bNAb** | **% Coveragescaled**  **(IC50<50µg/mL)** | **IC50 Range(µg/mL)** | **IC50 geom mean (IC50<50** **µg /ml)** | **Ref.** |
| --- | --- | --- | --- | --- | --- |
| NA | IG05 | 18.04 | 0.01-0.1 | 0.09 | (43) |
| NA | 2 E01 | 18.04 | 0.01-1 | 0.33 | (43) |
| NA | 2D10 | 18.04 | 0.01-40 | 0.84 | (43) |
| NA | 2H09 | 16.02 | 0.01->40 | 0.41 | (43) |
| NA | 3C01 | 12.01 | 0.1->40 | 4.82 | (43) |
| NA | 1D05 | 10.01 | 0.1->40 | 1.87 | (43) |
| NA | 1G01 | 12.01 | 10-40 | 11.73 | (43) |
| HA stalk | 9H10 | 85.60 | 0.03-100 | 0.37 | (44) |
| HA stem | PN-SIA28 | 99.43 | 0.7->10 | 1.13 | (45) |
| HA stem | PN-SIA49 | 32.33 | 2.1-6.99 | 4.05 | (46) |
| HA1 domain of HA | 65C6 | 20.93 | 0.002-0.034 | 0.01 | (47) |
| HA1 domain of HA | 100F4 | 20.93 | 0.004-0.067 | 0.024 | (47) |
| HA1 domain of HA | 3C11 | 13.14 | 0.018-62.19 | 1.1 | (47) |
| HA | C12H50 | 70.82 | 0.08-17.68 | 2.11 | (48) |
| HA | 5J8 | 40.46 | 0.07->50 | 0.26 | (48) |
| HA | CH65 | 30.36 | 0.07->50 | 0.86 | (48) |
| HA | Ab6649 | 45.54 | 7.98->50 | 12.54 | (48) |
| HA | F10 | 70.82 | 1.3-25 | 6.42 | (48) |
| HA | FI6 | 70.82 | 2.52-35.3 | 10.65 | (48) |
| HA | CR8033 | 50.55 | 0.03-5.2 | 0.23 | (49) |
| HA | CR8071 | 50.55 | 1.6-8.8 | 2.69 | (49) |

**Supplementary Table 4:** Neutralisation profiles of SARS-CoV-2 bNAbs

| **Epitope** | **bNAb** | **% Coveragescaled**  **(IC50<50µg/mL)** | **IC50 Range (µg /mL)** | **IC50 geom mean Potency (µg/mL)** | **IC50 against WT (ug/mL)** | **Ref.** |
| --- | --- | --- | --- | --- | --- | --- |
| RBD | ABP18 | 3.30 | 0.002->20 | 0.032 | 0.029 | (50) |
| RBD | 10-18-hAb13 | 3.30 | 0.07-0.23 | 0.026 | 0.0077 | (51) |
| RBD | 10-18-hAb70 | 2.18 | 0.012-0.052 | 0.101 | 0.0012 | (51) |
| RBD | 10-18-hAb68 | 3.30 | 0.015->1.0 | 0.022 | 0.0015 | (51) |
| RBD | 10-18-hAb54 | 3.30 | 0.01-0.037 | 0.079 | 0.001 | (51) |
| RBD | 10-18-hAb91 | 1.09 | 0.011-0.349 | 0.010 | 0.0114 | (51) |
| RBD | 10-18-hAb11 | 3.30 | 0.010->1.0 | 0.080 | 0.0109 | (51) |
| RBD | 10-18-hAb73 | 3.30 | 0.011-0.259 | 0.099 | 0.0116 | (51) |
| RBD | 10-18-hAb93 | 2.18 | 0.008-0.139 | 0.093 | 0.0088 | (51) |
| RBD | 10-18-hAb14 | 3.30 | 0.011->1.0 | 0.137 | 0.011 | (51) |
| RBD | 10-18-hAb41 | 3.30 | 0.016-0.426 | 0.072 | 0.016 | (51) |
| RBD | 10-18-hAb10-2 | 3.30 | 0.014-0.201 | 0.082 | 0.014 | (51) |
| RBD | 10-18-hAb16 | 3.30 | 0.13-0.269 | 0.036 | 0.013 | (51) |
| RBD | 10-18-hAb35 | 3.30 | 0.012-0.071 | 0.061 | 0.012 | (51) |
| RBD | 10-18-hAb20 | 3.30 | 0.006-0.247 | 0.094 | 0.006 | (51) |
| RBD | 10-18-hAb56 | 2.18 | 0.0069-0.442 | 0.083 | 0.0069 | (51) |
| RBD | 10-18-hAb59 | 1.09 | 0.017->1.0 | 0.001 | 0.017 | (51) |
| RBD | Bebtelovimab | 3.30 | 0.0017>1.0 | 0.032 | 0.0017 | (51) |
| RBD | covox-222 |  |  |  | 0.016 | (52) |
| RBD | covox-253 |  |  |  | 0.04 | (52) |
| RBD | A23-58.1 |  |  |  | 0.002 | (52) |
| RBD | A23-58.1 |  |  |  | 0.002 | (52) |
| RBD | B1-182.1 |  |  |  | 0.002 | (52) |
| RBD | B1-182.1 |  |  |  | 0.003 | (52) |
| RBD | Fab 1-57 |  |  |  | 0.008 | (52) |
| RBD | Fab 2-7 |  |  |  | 0.003 | (52) |
| RBD | 54042-4 |  | 0.0032-0.013 | 0.0078 | 0.0032 | (52) |
| RBD | Ly-CoV1404 | 3.15 | 0.001-0.002 | 0.005 | 0.067 | (52) |
| RBD | S2X259 |  |  |  | 0.144 | (52) |
| RBD | S2X259 |  |  |  | 0.213 | (52) |
| RBD | C118 |  |  |  | 0.001 | (52) |
| RBD | C022 |  |  |  | 0.001 | (52) |
| RBD | BG10-19 |  | 0.001-0.004 | 0.0035 | 0.002 | (52) |
| RBD | LY-COV555 | 2.17 | 0.01->10 | 0.002 | 0.012 | (52) |
| RBD | MD65 |  | 0.04-0.4 | 0.18 | 0.1 | (52) |
| RBD | LY-Cov1404 |  |  |  | 0.003 | (52) |
| Stem helix of S2 subunit | S2P6 |  |  |  | 0.0014 | (52) |
| RBD | BL6 |  | 0.08-2.3 | 1.02 | 0.7 | (53) |
| NTD | BLN12 | 2.17 | 0.07-98 | 0.57 | 0.07 | (53) |
| RBD | MD29 | 3.3 | 2.99-12.9 | 6.4 | 7.8 | (53) |
| (ACE2)-blocking | h11B11 |  | 0.46-5.3 | 1.47 | 0.95 | (54) |
| RBD | P2C-1F11 |  |  |  | 0.03 | (55) |
| RBD | P2B-2F6 |  |  |  | 0.05 | (55) |
| RBD | P2C-1A3 |  |  |  | 0.62 | (55) |
| RBD | P2C1C10 |  |  |  | 2.62 | (55) |
| RBD | P2B2G4 |  |  |  | 5.11 | (55) |
| RBD | P2A1A0B |  |  |  | 7.68 | (55) |
| RBD | P2A1A10 |  |  |  | 8.57 | (55) |
| Spike | BD-217 |  |  |  | 0.031 | (56) |
| Spike | BD-218 |  |  |  | 0.011 | (56) |
| Spike | BD-236 |  |  |  | 0.037 | (56) |
| RBD | BD-361 |  |  |  | 0.02 | (56) |
| RBD | BD-368 |  |  |  | 0.035 | (56) |
| RBD | BD-368-2 |  |  |  | 0.0012 | (56) |
| RBD | BD-395 |  |  |  | 0.02 | (56) |
| Spike | BD-217 |  |  |  | 0.84 | (56) |
| Spike | BD-218 |  |  |  | 0.29 | (56) |
| Spike | BD-236 |  |  |  | 0.52 | (56) |
| RBD | BD-361 |  |  |  | 0.78 | (56) |
| RBD | BD-368 |  |  |  | 1.6 | (56) |
| RBD | BD-368-2 |  |  |  | 0.015 | (56) |
| RBD | BD-395 |  |  |  | 0.27 | (56) |
| RBD | 58G6 | 7.79 | 0.001-0.54 | 0.017 | 0.001 | (57) |
| RBD | 19n01 | 7.29 | 0.15-0.33 | 0.059 | 0.16 | (58) |
| RBD | 01n21 | 5.1 | 0.08->7 | 0.200 | 0.17 | (58) |
| RBD | 20n01 | 1.45 | 0.08->7 | 0.05 | 0.08 | (58) |
| RBD | ABP18 |  |  |  | 0.06 | (59) |
| RBD | NBP11 |  |  |  | 1.5 | (59) |
| RBD | 515-1 |  |  |  | 0.96 | (60) |
| RBD | 505-5 |  |  |  | 0.96 | (60) |
| RBD | 413-2 |  |  |  | 8 | (60) |
| RBD | 553-49 |  |  |  | 0.46 | (60) |
| RBD | 505-3 |  |  |  | 1.5 | (60) |
| RBD | 553-15 |  |  |  | 4.5 | (60) |
| RBD | 553-63 |  |  |  | 0.96 | (60) |
| RBD | 414-1 |  |  |  | 0.28 | (60) |
| RBD | 553-60 |  |  |  | 1.5 | (60) |
| RBD | 505-8 |  |  |  | 0.6 | (60) |
| RBD | 515-5 |  |  |  | 8 | (60) |
| RBD | 515-1 |  |  |  | 3.9 | (60) |
| RBD | 505-5 |  |  |  | 3.9 | (60) |
| RBD | 413-2 |  |  |  | 8.7 | (60) |
| RBD | 553-49 |  |  |  | 1.48 | (60) |
| RBD | 505-3 |  |  |  | 0.36 | (60) |
| RBD | 553-15 |  |  |  | 0.29 | (60) |
| RBD | 553-63 |  |  |  | 0.57 | (60) |
| RBD | 414-1 |  |  |  | 0.49 | (60) |
| RBD | 553-60 |  |  |  | 0.45 | (60) |
| RBD | 505-8 |  |  |  | 0.74 | (60) |
| RBD | 515-5 |  |  |  | 0.86 | (60) |
| RBD | RBD-chAb-1 | 3.54 | 0.017-0.429 | 0.0.37 | 0.024 | (61) |
| RBD | RBD-chAb-15 | 3.54 | 0.007-0.103 | 0.032 | 0.021 | (61) |
| RBD | RBD-chAb-28 | 3.54 | 0.003-0.094 | 0.016 | 0.099 | (61) |
| RBD | RBD-chAb-45 | 3.54 | 0.007-0.015 | 0.004 | 0.001 | (61) |
| RBD | RBD-chAb-51 | 3.54 | 0.0007-0.008 | 0.0018 | 0.001 | (61) |
| RBD | BiNAB | 2.83 | 0.027-0.165 | 0.052 | 0.029 | (62) |
| RBD | 35B5 | 2.93 | 0.091-0.216 | 0.17 | 0.133 | (62) |
| RBD | 32C7 | 1.11 | 0.011->20.0 | 0.18 | 0.383 | (62) |
| RBD | 3A9 |  |  |  | 0.093 | (63) |
| RBD | 1F2 |  |  |  | 0.004 | (63) |
| RBD | 1D10 |  |  |  | 0.073 | (63) |
| RBD | 1B6 |  |  |  | 0.012 | (63) |
| RBD | 1H8 |  |  |  | 0.02 | (63) |
| RBD | 2B11 |  |  |  | 0.006 | (63) |
| RBD | 1D7 |  |  |  | 0.03 | (63) |
| RBD | 2A2 |  |  |  | 0.705 | (63) |
| RBD | 1 E10 |  |  |  | 0.094 | (63) |
| RBD | 1B10 |  |  |  | 0.112 | (63) |
| RBD | 3A9 |  |  |  | 1.54 | (63) |
| RBD | 1F2 |  |  |  | 0.025 | (63) |
| RBD | 1D10 |  |  |  | 0.085 | (63) |
| RBD | 1B6 |  |  |  | 0.018 | (63) |
| RBD | 1H8 |  |  |  | 0.035 | (63) |
| RBD | 2B11 |  |  |  | 0.001 | (63) |
| RBD | 1D7 |  |  |  | 0.034 | (63) |
| RBD | 2A2 |  |  |  | 1.17 | (63) |
| RBD | 1 E10 |  |  |  | 0.021 | (63) |
| RBD | 1B10 |  |  |  | 0.079 | (63) |
| S2 spike stem-helix | CC25.112 | 7.4 | 1.5-6.2 | 4.05 | 1.5 | (64) |
| S2 spike stem-helix | CC67.105 | 7.4 | 0.8-39 | 2.3 | 0.8 | (64) |
| S2 spike stem-helix | CC67.130 | 7.4 | 0.2-3.4 | 2.03 | 0.8 | (64) |
| S2 spike stem-helix | CC68.104 | 3.7 | 1.8-25 | 9.5 | 1.8 | (64) |
| S2 spike stem-helix | CC95.102 | 7.4 | 0.1-1.8 | 0.71 | 0.1 | (64) |
| S2 spike stem-helix | CC9.104 | 7.4 | 0.5-4.3 | 1.9 | 0.7 | (64) |
| S2 spike stem-helix | CC25.103 | 7.4 | 1.5-7.3 | 3.1 | 1.5 | (64) |
| S2 spike stem-helix | CC95.108 | 6.87 | 1.5-12 | 5.4 | 1.5 | (64) |
| RBD | C121 |  |  |  | 0.001 | (65) |
| RBD | C144 |  |  |  | 0.002 | (65) |
| RBD | C135 |  |  |  | 0.0029 | (65) |

**Supplementary Table 5.** Accession numbers of strains utilized for assessing genetic diversity among influenza strains against which NmAbs were tested. Sequence data was obtained from the NCBI database (<https://www.ncbi.nlm.nih.gov>)

| Influenza | Protein | HA Subtype | Accession |
| --- | --- | --- | --- |
| A | HA | H1 | ACR15348.1 |
| A | HA | H1 | CAC86622.1 |
| A | HA | H1 | ACD65202.1 |
| A | HA | H1 | ABW23335.1 |
| A | HA | H1 | ACA33787.1 |
| A | HA | H1 | AAD17229.1 |
| A | HA | H2 | AAA43678.1 |
| A | HA | H3 | AAA43178.1 |
| A | HA | H3 | AAT08000.1 |
| A | HA | H3 | ABB80001.1 |
| A | HA | H3 | ACC67353.1 |
| A | HA | H3 | ACD47224.1 |
| A | HA | H4 | AAA43216.1 |
| A | HA | H5 | ACO07033.1 |
| A | HA | H5 | AAT73313.1 |
| A | HA | H5 | AAW80717.1 |
| A | HA | H5 | AAW19638.1 |
| A | HA | H5 | ABI94747.1 |
| A | HA | H5 | ABP51985.1 |
| A | HA | H5 | ABQ58979.1 |
| A | HA | H5 | ABJ96698.1 |
| A | HA | H5 | ABC66526.1 |
| A | HA | H5 | ABE68931.1 |
| A | HA | H5 | AAX53508.1 |
| A | HA | H5 | AAF02303.1 |
| A | HA | H5 | AAO52864.1 |
| A | HA | H5 | AAC40508.1 |
| A | HA | H5 | ABD14809.1 |
| A | HA | H5 | ABU99037.1 |
| A | HA | H5 | AAV97604.1 |
| A | HA | H5 | ABP51986.1 |
| A | HA | H5 | ABW06108.1 |
| A | HA | H5 | ABO36644.1 |
| A | HA | H5 | ABD28180.1 |
| A | HA | H5 | ABE68930.1 |
| A | HA | H5 | ACJ26242.1 |
| A | HA | H5 | ABD73284.1 |
| A | HA | H5 | ACJ68614.1 |
| A | HA | H5 | ABQ58925.1 |
| A | HA | H6 | BAF36386.1 |
| A | HA | H7 | AAA43150.1 |
| A | HA | H7 | AAR02639.2 |
| A | HA | H7 | AAK58941.1 |
| A | HA | H8 | AAG38555.1 |
| A | HA | H9 | AAG48168.1 |
| A | HA | H10 | AAA79774.1 |
| A | HA | H10 | AAA79775.1 |
| A | HA | H11 | ABD66296.1 |
| A | HA | H12 | ACS93991.1 |
| A | HA | H13 | AAA43214.1 |
| A | HA | H14 | ACS93993.1 |
| A | HA | H15 | ABB88138.1 |
| A | HA | H16 | AAV91214.1 |
| A | HA | H17 | AFC35428.1 |
| A | HA | H18 | AGX84934.1 |
| B | HA |  | BAQ58204.1 |
| B | HA |  | BAQ58163.1 |
| B | NA |  | BAQ58207.1 |
| B | NA |  | BAQ58166.1 |

**Supplementary Table 6.** Accession numbers of strains utilized for assessing genetic diversity among HCV subtypes against which NmAbs were tested. Reference sequence data was obtained from HCV GLUE database (<http://hcv-glue.cvr.gla.ac.uk>) (66).

| Subtype | Protein | Accession |
| --- | --- | --- |
| 1a | E2 | NP_751921.1 |
| 1b | E2 | BAA14233.1 |
| 2a | E2 | BAA00792.1 |
| 2b | E2 | BAA01761.1 |
| 2c | E2 | BAA08911.1 |
| 2i | E2 | AAZ85047.1 |
| 2x | E2 | AAW65871.1 |
| 3a | E2 | YP_001491551.1 |
| 4a | E2 | YP_009272637.1 |
| 5a | E2 | YP_009272649.1 |
| 6 | E2 | YP_009272661.1 |
| 6a | E2 | CAA72801.1 |


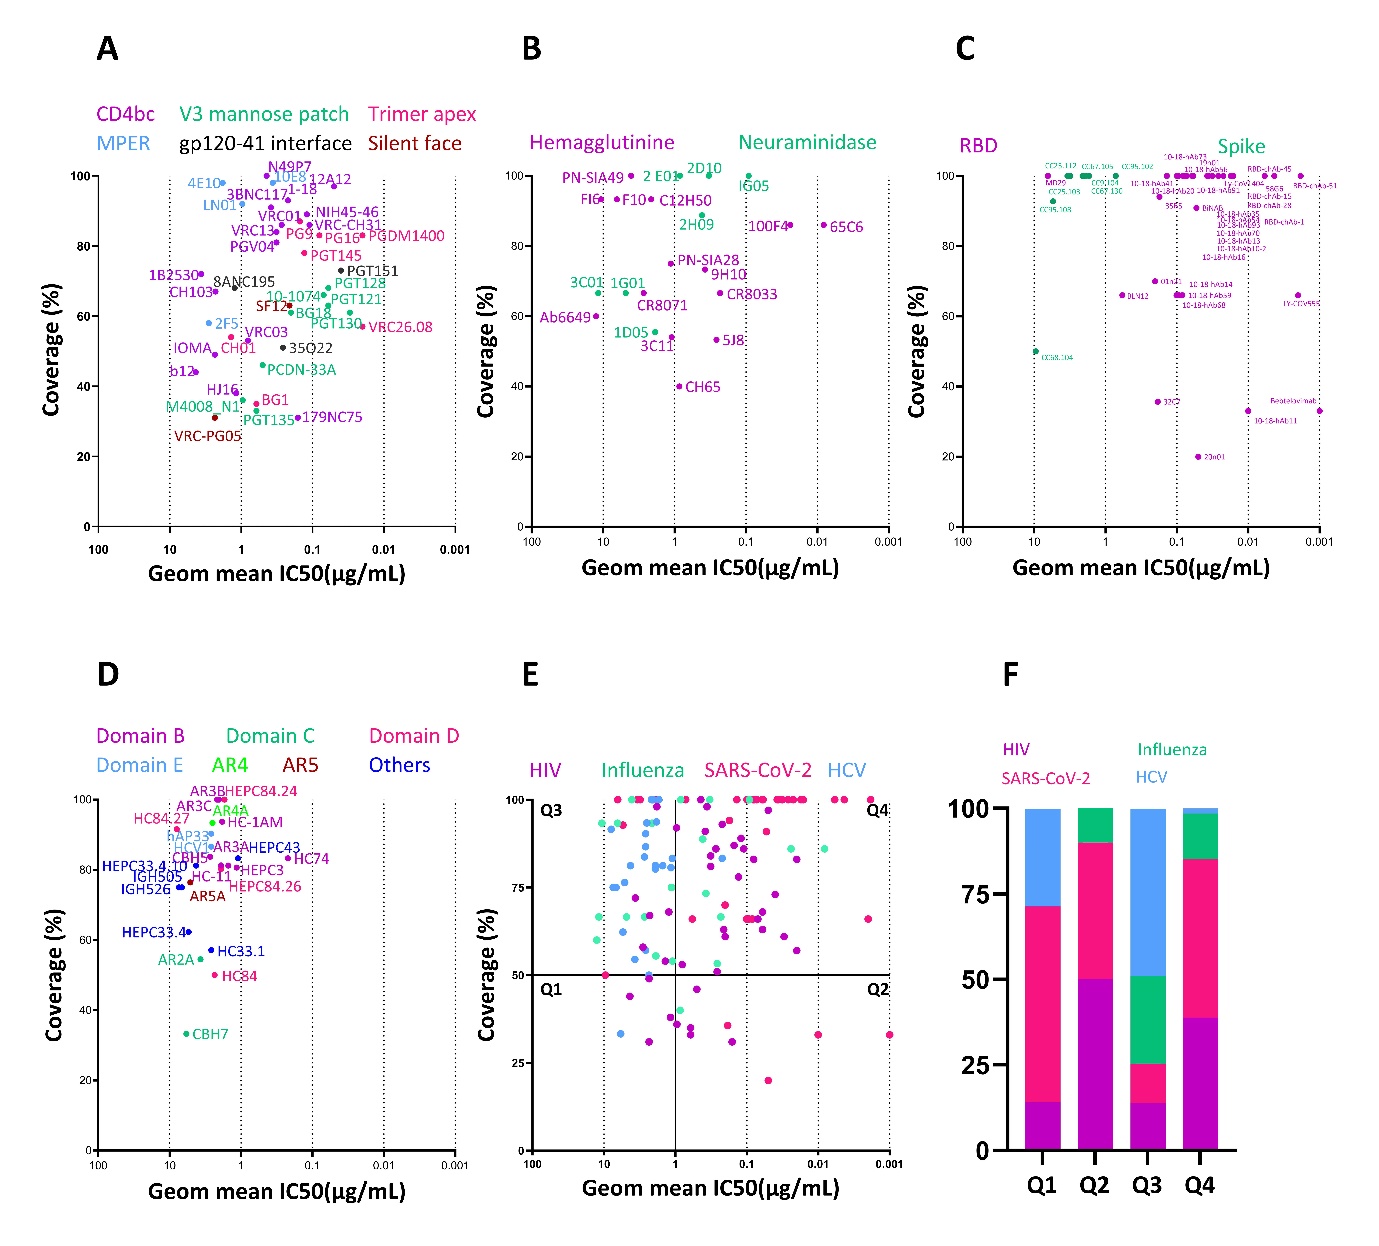


**Supplementary Figure 1.** Panels A. to D. present the geometric mean of IC50 values versus %coverage(not scaled) for HIV, influenza, SARS-CoV-2 and HCV NmAbs, respectively. NmAbs are colored according to their target sites. Panel E presents the geometric mean of IC50 values versus %coveragescaled for NmAbs against the four viruses altogether (HIV, purple; influenza, green; SARS-CoV-2, red and HCV, blue). Panel F shows the frequency of NmAbs across different viruses in each quadrant of panel E.

**References:**

1. Burton DR, Pyati J, Koduri R, Sharp SJ, Thornton GB, Parren PW, et al. Efficient neutralization of primary isolates of HIV-1 by a recombinant human monoclonal antibody. Science. 1994;266(5187):1024-7.

2. Zwick MB, Parren PW, Saphire EO, Church S, Wang M, Scott JK, et al. Molecular features of the broadly neutralizing immunoglobulin G1 b12 required for recognition of human immunodeficiency virus type 1 gp120. J Virol. 2003;77(10):5863-76.

3. Griffith SA, McCoy LE. To bnAb or not to bnAb: defining broadly neutralising antibodies against HIV-1. Frontiers in immunology. 2021;12:708227.

4. Zhou T, Lynch RM, Chen L, Acharya P, Wu X, Doria-Rose NA, et al. Structural Repertoire of HIV-1-Neutralizing Antibodies Targeting the CD4 Supersite in 14 Donors. Cell. 2015;161(6):1280-92.

5. Corti D, Langedijk JP, Hinz A, Seaman MS, Vanzetta F, Fernandez-Rodriguez BM, et al. Analysis of memory B cell responses and isolation of novel monoclonal antibodies with neutralizing breadth from HIV-1-infected individuals. PLoS One. 2010;5(1):e8805.

6. Wu X, Yang ZY, Li Y, Hogerkorp CM, Schief WR, Seaman MS, et al. Rational design of envelope identifies broadly neutralizing human monoclonal antibodies to HIV-1. Science. 2010;329(5993):856-61.

7. Scheid JF, Mouquet H, Ueberheide B, Diskin R, Klein F, Oliveira TY, et al. Sequence and structural convergence of broad and potent HIV antibodies that mimic CD4 binding. Science. 2011;333(6049):1633-7.

8. Wu X, Zhou T, Zhu J, Zhang B, Georgiev I, Wang C, et al. Focused evolution of HIV-1 neutralizing antibodies revealed by structures and deep sequencing. Science. 2011;333(6049):1593-602.

9. Liao HX, Lynch R, Zhou T, Gao F, Alam SM, Boyd SD, et al. Co-evolution of a broadly neutralizing HIV-1 antibody and founder virus. Nature. 2013;496(7446):469-76.

10. Georgiev IS, Doria-Rose NA, Zhou T, Kwon YD, Staupe RP, Moquin S, et al. Delineating antibody recognition in polyclonal sera from patterns of HIV-1 isolate neutralization. Science. 2013;340(6133):751-6.

11. Zhou T, Zhu J, Wu X, Moquin S, Zhang B, Acharya P, et al. Multidonor analysis reveals structural elements, genetic determinants, and maturation pathway for HIV-1 neutralization by VRC01-class antibodies. Immunity. 2013;39(2):245-58.

12. Freund NT, Horwitz JA, Nogueira L, Sievers SA, Scharf L, Scheid JF, et al. A New Glycan-Dependent CD4-Binding Site Neutralizing Antibody Exerts Pressure on HIV-1 In Vivo. PLoS Pathog. 2015;11(10):e1005238.

13. Bonsignori M, Zhou T, Sheng Z, Chen L, Gao F, Joyce MG, et al. Maturation Pathway from Germline to Broad HIV-1 Neutralizer of a CD4-Mimic Antibody. Cell. 2016;165(2):449-63.

14. Walker LM, Huber M, Doores KJ, Falkowska E, Pejchal R, Julien JP, et al. Broad neutralization coverage of HIV by multiple highly potent antibodies. Nature. 2011;477(7365):466-70.

15. Mouquet H, Scharf L, Euler Z, Liu Y, Eden C, Scheid JF, et al. Complex-type N-glycan recognition by potent broadly neutralizing HIV antibodies. Proc Natl Acad Sci U S A. 2012;109(47):E3268-77.

16. Sok D, Pauthner M, Briney B, Lee JH, Saye-Francisco KL, Hsueh J, et al. A Prominent Site of Antibody Vulnerability on HIV Envelope Incorporates a Motif Associated with CCR5 Binding and Its Camouflaging Glycans. Immunity. 2016;45(1):31-45.

17. MacLeod DT, Choi NM, Briney B, Garces F, Ver LS, Landais E, et al. Early Antibody Lineage Diversification and Independent Limb Maturation Lead to Broad HIV-1 Neutralization Targeting the Env High-Mannose Patch. Immunity. 2016;44(5):1215-26.

18. Walker LM, Phogat SK, Chan-Hui PY, Wagner D, Phung P, Goss JL, et al. Broad and potent neutralizing antibodies from an African donor reveal a new HIV-1 vaccine target. Science. 2009;326(5950):285-9.

19. Bonsignori M, Hwang KK, Chen X, Tsao CY, Morris L, Gray E, et al. Analysis of a clonal lineage of HIV-1 envelope V2/V3 conformational epitope-specific broadly neutralizing antibodies and their inferred unmutated common ancestors. J Virol. 2011;85(19):9998-10009.

20. Sok D, van Gils MJ, Pauthner M, Julien JP, Saye-Francisco KL, Hsueh J, et al. Recombinant HIV envelope trimer selects for quaternary-dependent antibodies targeting the trimer apex. Proc Natl Acad Sci U S A. 2014;111(49):17624-9.

21. Doria-Rose NA, Schramm CA, Gorman J, Moore PL, Bhiman JN, DeKosky BJ, et al. Developmental pathway for potent V1V2-directed HIV-neutralizing antibodies. Nature. 2014;509(7498):55-62.

22. Doria-Rose NA, Bhiman JN, Roark RS, Schramm CA, Gorman J, Chuang GY, et al. New Member of the V1V2-Directed CAP256-VRC26 Lineage That Shows Increased Breadth and Exceptional Potency. J Virol. 2016;90(1):76-91.

23. Huang J, Ofek G, Laub L, Louder MK, Doria-Rose NA, Longo NS, et al. Broad and potent neutralization of HIV-1 by a gp41-specific human antibody. Nature. 2012;491(7424):406-12.

24. Williams LD, Ofek G, Schätzle S, McDaniel JR, Lu X, Nicely NI, et al. Potent and broad HIV-neutralizing antibodies in memory B cells and plasma. Sci Immunol. 2017;2(7).

25. Pinto D, Fenwick C, Caillat C, Silacci C, Guseva S, Dehez F, et al. Structural Basis for Broad HIV-1 Neutralization by the MPER-Specific Human Broadly Neutralizing Antibody LN01. Cell Host Microbe. 2019;26(5):623-37.e8.

26. Scharf L, Scheid JF, Lee JH, West AP, Jr., Chen C, Gao H, et al. Antibody 8ANC195 reveals a site of broad vulnerability on the HIV-1 envelope spike. Cell Rep. 2014;7(3):785-95.

27. Klein F, Gaebler C, Mouquet H, Sather DN, Lehmann C, Scheid JF, et al. Broad neutralization by a combination of antibodies recognizing the CD4 binding site and a new conformational epitope on the HIV-1 envelope protein. J Exp Med. 2012;209(8):1469-79.

28. Lee JH, Leaman DP, Kim AS, Torrents de la Peña A, Sliepen K, Yasmeen A, et al. Antibodies to a conformational epitope on gp41 neutralize HIV-1 by destabilizing the Env spike. Nat Commun. 2015;6:8167.

29. Falkowska E, Le KM, Ramos A, Doores KJ, Lee JH, Blattner C, et al. Broadly neutralizing HIV antibodies define a glycan-dependent epitope on the prefusion conformation of gp41 on cleaved envelope trimers. Immunity. 2014;40(5):657-68.

30. Zhou T, Zheng A, Baxa U, Chuang GY, Georgiev IS, Kong R, et al. A Neutralizing Antibody Recognizing Primarily N-Linked Glycan Targets the Silent Face of the HIV Envelope. Immunity. 2018;48(3):500-13.e6.

31. Schoofs T, Barnes CO, Suh-Toma N, Golijanin J, Schommers P, Gruell H, et al. Broad and Potent Neutralizing Antibodies Recognize the Silent Face of the HIV Envelope. Immunity. 2019;50(6):1513-29.e9.

32. Giang E, Dorner M, Prentoe JC, Dreux M, Evans MJ, Bukh J, et al. Human broadly neutralizing antibodies to the envelope glycoprotein complex of hepatitis C virus. Proceedings of the National Academy of Sciences. 2012;109(16):6205-10.

33. Carlsen TH, Pedersen J, Prentoe JC, Giang E, Keck ZY, Mikkelsen LS, et al. Breadth of neutralization and synergy of clinically relevant human monoclonal antibodies against HCV genotypes 1a, 1b, 2a, 2b, 2c, and 3a. Hepatology. 2014;60(5):1551-62.

34. Salas JH, Urbanowicz RA, Guest JD, Frumento N, Figueroa A, Clark KE, et al. An antigenically diverse, representative panel of envelope glycoproteins for hepatitis C virus vaccine development. Gastroenterology. 2022;162(2):562-74.

35. Bailey JR, Flyak AI, Cohen VJ, Li H, Wasilewski LN, Snider AE, et al. Broadly neutralizing antibodies with few somatic mutations and hepatitis C virus clearance. JCI insight. 2017;2(9).

36. Bozhanova NG, Flyak AI, Brown BP, Ruiz SE, Salas J, Rho S, et al. Computational identification of HCV neutralizing antibodies with a common HCDR3 disulfide bond motif in the antibody repertoires of infected individuals. Nature communications. 2022;13(1):3178.

37. Law M, Maruyama T, Lewis J, Giang E, Tarr AW, Stamataki Z, et al. Broadly neutralizing antibodies protect against hepatitis C virus quasispecies challenge. Nature medicine. 2008;14(1):25-7.

38. Sun J, Brusic V. A systematic analysis of a broadly neutralizing antibody AR3C epitopes on Hepatitis C virus E2 envelope glycoprotein and their cross-reactivity. BMC Medical Genomics. 2015;8:1-9.

39. Keck Z-Y, Pierce BG, Lau P, Lu J, Wang Y, Underwood A, et al. Broadly neutralizing antibodies from an individual that naturally cleared multiple hepatitis C virus infections uncover molecular determinants for E2 targeting and vaccine design. PLoS pathogens. 2019;15(5):e1007772.

40. Desombere I, Mesalam AA, Urbanowicz RA, Van Houtte F, Verhoye L, Keck Z-Y, et al. A novel neutralizing human monoclonal antibody broadly abrogates hepatitis C virus infection in vitro and in vivo. Antiviral research. 2017;148:53-64.

41. Meunier J-C, Russell RS, Goossens V, Priem S, Walter H, Depla E, et al. Isolation and characterization of broadly neutralizing human monoclonal antibodies to the e1 glycoprotein of hepatitis C virus. Journal of virology. 2008;82(2):966-73.

42. Keck Z, Wang W, Wang Y, Lau P, Carlsen TH, Prentoe J, et al. Cooperativity in virus neutralization by human monoclonal antibodies to two adjacent regions located at the amino terminus of hepatitis C virus E2 glycoprotein. Journal of virology. 2013;87(1):37-51.

43. Madsen A, Dai Y-N, McMahon M, Schmitz AJ, Turner JS, Tan J, et al. Human antibodies targeting influenza B virus neuraminidase active site are broadly protective. Immunity. 2020;53(4):852-63. e7.

44. Tan GS, Lee PS, Hoffman RM, Mazel-Sanchez B, Krammer F, Leon PE, et al. Characterization of a broadly neutralizing monoclonal antibody that targets the fusion domain of group 2 influenza A virus hemagglutinin. Journal of virology. 2014;88(23):13580-92.

45. Chen Y, Wang F, Yin L, Jiang H, Lu X, Bi Y, et al. Structural basis for a human broadly neutralizing influenza A hemagglutinin stem-specific antibody including H17/18 subtypes. Nature Communications. 2022;13(1):7603.

46. Burioni R, Canducci F, Mancini N, Clementi N, Sassi M, De Marco D, et al. Monoclonal antibodies isolated from human B cells neutralize a broad range of H1 subtype influenza A viruses including swine-origin Influenza virus (S-OIV). Virology. 2010;399(1):144-52.

47. Hu H, Voss J, Zhang G, Buchy P, Zuo T, Wang L, et al. A human antibody recognizing a conserved epitope of H5 hemagglutinin broadly neutralizes highly pathogenic avian influenza H5N1 viruses. Journal of virology. 2012;86(6):2978-89.

48. Li T, Chen J, Zheng Q, Xue W, Zhang L, Rong R, et al. Identification of a cross-neutralizing antibody that targets the receptor binding site of H1N1 and H5N1 influenza viruses. Nature Communications. 2022;13(1):5182.

49. Dreyfus C, Laursen NS, Kwaks T, Zuijdgeest D, Khayat R, Ekiert DC, et al. Highly conserved protective epitopes on influenza B viruses. Science. 2012;337(6100):1343-8.

50. Wang P, Casner RG, Nair MS, Yu J, Guo Y, Wang M, et al. A monoclonal antibody that neutralizes SARS-CoV-2 variants, SARS-CoV, and other sarbecoviruses. Emerging Microbes & Infections. 2022;11(1):147-57.

51. Chiang H-L, Liang K-H, Lu R-M, Kuo T-W, Lin YL, Wu H-C. Broadly neutralizing human antibodies against Omicron subvariants of SARS-CoV-2. Journal of Biomedical Science. 2023;30(1):59.

52. Shrestha LB, Tedla N, Bull RA. Broadly-neutralizing antibodies against emerging SARS-CoV-2 variants. Frontiers in immunology. 2021:4025.

53. Makdasi E, Zvi A, Alcalay R, Noy-Porat T, Peretz E, Mechaly A, et al. The neutralization potency of anti-SARS-CoV-2 therapeutic human monoclonal antibodies is retained against viral variants. Cell Reports. 2021;36(10).

54. Du Y, Shi R, Zhang Y, Duan X, Li L, Zhang J, et al. A broadly neutralizing humanized ACE2-targeting antibody against SARS-CoV-2 variants. Nature communications. 2021;12(1):5000.

55. Ju B, Zhang Q, Ge J, Wang R, Sun J, Ge X, et al. Human neutralizing antibodies elicited by SARS-CoV-2 infection. Nature. 2020;584(7819):115-9.

56. Cao Y, Su B, Guo X, Sun W, Deng Y, Bao L, et al. Potent neutralizing antibodies against SARS-CoV-2 identified by high-throughput single-cell sequencing of convalescent patients’ B cells. Cell. 2020;182(1):73-84. e16.

57. Zhang X, Zhang H, Li T, Chen S, Luo F, Zhou J, et al. A potent neutralizing antibody provides protection against SARS-CoV-2 Omicron and Delta variants via nasal delivery. Signal transduction and targeted therapy. 2022;7(1):301.

58. García-Vega M, Melgoza-González EA, Hernández-Valenzuela S, Hinojosa-Trujillo D, Reséndiz-Sandoval M, Llamas-Covarrubias MA, et al. 19n01, a broadly neutralizing antibody against omicron BA. 1, BA. 2, BA. 4/5, and other SARS-CoV-2 variants of concern. Iscience. 2023;26(4).

59. Bell BN, Powell AE, Rodriguez C, Cochran JR, Kim PS. Neutralizing antibodies targeting the SARS‐CoV‐2 receptor binding domain isolated from a naïve human antibody library. Protein Science. 2021;30(4):716-27.

60. Wan J, Xing S, Ding L, Wang Y, Gu C, Wu Y, et al. Human-IgG-neutralizing monoclonal antibodies block the SARS-CoV-2 infection. Cell reports. 2020;32(3).

61. Liang K-H, Chiang P-Y, Ko S-H, Chou Y-C, Lu R-M, Lin H-T, et al. Antibody cocktail effective against variants of SARS-CoV-2. Journal of Biomedical Science. 2021;28(1):1-12.

62. Yuan M, Zhu Y, Liu G, Wang Y, Wang G, Zhang G, et al. An RBD bispecific antibody effectively neutralizes a SARS-CoV-2 Omicron variant. One Health Advances. 2023;1(1):1-13.

63. Pan Y, Du J, Liu J, Wu H, Gui F, Zhang N, et al. Screening of potent neutralizing antibodies against SARS-CoV-2 using convalescent patients-derived phage-display libraries. Cell discovery. 2021;7(1):57.

64. Zhou P, Song G, Liu H, Yuan M, He W-t, Beutler N, et al. Broadly neutralizing anti-S2 antibodies protect against all three human betacoronaviruses that cause deadly disease. Immunity. 2023;56(3):669-86. e7.

65. Robbiani DF, Gaebler C, Muecksch F, Lorenzi JC, Wang Z, Cho A, et al. Convergent antibody responses to SARS-CoV-2 in convalescent individuals. Nature. 2020;584(7821):437-42.

66. Singer JB, Thomson EC, McLauchlan J, Hughes J, Gifford RJ. GLUE: a flexible software system for virus sequence data. BMC bioinformatics. 2018;19:1-18.
